# Supplementary material for: Ligand field and anion-driven structures and magnetic properties of dysprosium complexes
Source: Royal Society of Chemistry journal article supplement (doi:10.1039/d1ce00115a), 2021-01-01
Supplement: d1ce00115a1.pdf [file d1ce00115a1.pdf]

## Ligand field and anions-driven structures and magnetic properties of dysprosium complexes

Shao-Min Xu,<sup>a</sup> Zhong-Wu An,<sup>a</sup> Wei Zhang,<sup>a</sup> Yi-Quan Zhang<sup>\*b</sup> and Min-Xia Yao<sup>\*a</sup>

<sup>a</sup> College of Chemistry & Molecular Engineering, Nanjing Tech University, Nanjing, 211816, P. R. China.

<sup>b</sup> Jiangsu Key Lab for NSLSCS, School of Physical Science and Technology, Nanjing Normal University, Nanjing 210023, China.

**Table S1** Selected bond lengths (Å) and angles (°) for **1**.

|                 |           |                 |           |
|-----------------|-----------|-----------------|-----------|
| Dy(1)-O(2)      | 2.204(4)  | Dy(1)-O(1)      | 2.261(4)  |
| Dy(1)-O(3)      | 2.415(4)  | Dy(1)-N(3)      | 2.479(4)  |
| Dy(1)-N(5)      | 2.527(5)  | Dy(1)-N(2)      | 2.550(5)  |
| Dy(1)-N(1)      | 2.553(5)  | Dy(1)-N(4)      | 2.620(5)  |
| O(2)-Dy(1)-O(1) | 149.74(2) | O(2)-Dy(1)-O(3) | 131.55(2) |
| O(1)-Dy(1)-O(3) | 78.40(1)  | O(2)-Dy(1)-N(3) | 76.28(2)  |
| O(1)-Dy(1)-N(3) | 78.18(1)  | O(3)-Dy(1)-N(3) | 145.48(2) |
| O(2)-Dy(1)-N(5) | 92.16(2)  | O(1)-Dy(1)-N(5) | 92.88(2)  |
| O(3)-Dy(1)-N(5) | 74.34(2)  | N(3)-Dy(1)-N(5) | 131.80(2) |
| O(2)-Dy(1)-N(2) | 103.99(2) | O(1)-Dy(1)-N(2) | 80.09(1)  |
| O(3)-Dy(1)-N(2) | 84.69(1)  | N(3)-Dy(1)-N(2) | 66.55(2)  |
| N(5)-Dy(1)-N(2) | 158.86(2) | O(2)-Dy(1)-N(1) | 70.10(2)  |
| O(1)-Dy(1)-N(1) | 135.56(2) | O(3)-Dy(1)-N(1) | 70.48(2)  |
| N(3)-Dy(1)-N(1) | 111.40(2) | N(5)-Dy(1)-N(1) | 107.79(2) |
| N(2)-Dy(1)-N(1) | 66.42(2)  | O(2)-Dy(1)-N(4) | 74.10(2)  |
| O(1)-Dy(1)-N(4) | 81.06(1)  | O(3)-Dy(1)-N(4) | 133.20(1) |
| N(3)-Dy(1)-N(4) | 66.63(2)  | N(5)-Dy(1)-N(4) | 65.21(2)  |
| N(2)-Dy(1)-N(4) | 132.08(2) | N(1)-Dy(1)-N(4) | 143.26(2) |

**Table S2** Selected bond lengths (Å) and angles (°) for **2**.

|            |          |            |          |
|------------|----------|------------|----------|
| Dy(1)-O(1) | 2.188(2) | Dy(1)-O(2) | 2.224(1) |
| Dy(1)-O(4) | 2.498(1) | Dy(1)-N(3) | 2.550(2) |
| Dy(1)-O(3) | 2.583(1) | Dy(1)-N(5) | 2.646(2) |
| Dy(1)-N(2) | 2.652(2) | Dy(1)-N(4) | 2.679(2) |

\* To whom correspondence should be addressed. Email: yaomx@njtech.edu.cn; zhangyiquan@njnu.edu.cn Fax: +86-25-58139528.

|                 |           |                 |           |
|-----------------|-----------|-----------------|-----------|
| Dy(1)-N(1)      | 2.712(2)  | O(1)-Dy(1)-O(2) | 148.62(5) |
| O(1)-Dy(1)-O(4) | 127.55(5) | O(2)-Dy(1)-O(4) | 82.10(5)  |
| O(1)-Dy(1)-N(3) | 80.82(6)  | O(2)-Dy(1)-N(3) | 80.00(6)  |
| O(4)-Dy(1)-N(3) | 140.24(5) | O(1)-Dy(1)-O(3) | 79.93(5)  |
| O(2)-Dy(1)-O(3) | 123.59(5) | O(4)-Dy(1)-O(3) | 49.92(5)  |
| N(3)-Dy(1)-O(3) | 155.68(5) | O(1)-Dy(1)-N(5) | 75.09(6)  |
| O(2)-Dy(1)-N(5) | 131.59(6) | O(4)-Dy(1)-N(5) | 70.42(5)  |
| N(3)-Dy(1)-N(5) | 96.23(6)  | O(3)-Dy(1)-N(5) | 64.45(6)  |
| O(1)-Dy(1)-N(2) | 74.48(5)  | O(2)-Dy(1)-N(2) | 75.14(5)  |
| O(4)-Dy(1)-N(2) | 140.73(6) | N(3)-Dy(1)-N(2) | 66.28(5)  |
| O(3)-Dy(1)-N(2) | 121.74(5) | N(5)-Dy(1)-N(2) | 146.90(6) |
| O(1)-Dy(1)-N(4) | 115.90(6) | O(2)-Dy(1)-N(4) | 75.89(5)  |
| O(4)-Dy(1)-N(4) | 78.96(5)  | N(3)-Dy(1)-N(4) | 62.36(5)  |
| O(3)-Dy(1)-N(4) | 114.09(5) | N(5)-Dy(1)-N(4) | 60.53(5)  |
| N(2)-Dy(1)-N(4) | 124.16(5) | O(1)-Dy(1)-N(1) | 96.52(6)  |
| O(2)-Dy(1)-N(1) | 76.60(5)  | O(4)-Dy(1)-N(1) | 80.56(5)  |
| N(3)-Dy(1)-N(1) | 128.29(5) | O(3)-Dy(1)-N(1) | 68.85(5)  |
| N(5)-Dy(1)-N(1) | 133.30(6) | N(2)-Dy(1)-N(1) | 63.40(5)  |
| N(4)-Dy(1)-N(1) | 147.57(5) |                 |           |

**Table S3** Selected bond lengths (Å) and angles (°) for **3**.

|                 |           |                 |           |
|-----------------|-----------|-----------------|-----------|
| Dy(1)-O(2)      | 2.286 (2) | Dy(1)-O(1)      | 2.313(2)  |
| Dy(1)-O(3)      | 2.328(2)  | Dy(1)-O(4)      | 2.342(2)  |
| Dy(1)-N(3)      | 2.478(2)  | Dy(1)-N(1)      | 2.492(2)  |
| Dy(1)-N(4)      | 2.578(2)  | Dy(1)-N(2)      | 2.608(2)  |
| Dy(2)-O(8)      | 2.323(2)  | Dy(2)-O(6)      | 2.339(2)  |
| Dy(2)-O(9)      | 2.345(2)  | Dy(2)-O(7)      | 2.368(2)  |
| Dy(2)-O(5)      | 2.370(2)  | Dy(2)-O(10)     | 2.372(2)  |
| Dy(2)-O(1)      | 2.407(2)  | Dy(2)-O(2)      | 2.430(2)  |
| O(2)-Dy(1)-O(1) | 68.63(6)  | O(2)-Dy(1)-O(3) | 148.87(6) |
| O(1)-Dy(1)-O(3) | 142.29(6) | O(2)-Dy(1)-O(4) | 79.40(6)  |
| O(1)-Dy(1)-O(4) | 147.11(6) | O(3)-Dy(1)-O(4) | 70.30(6)  |
| O(2)-Dy(1)-N(3) | 130.19(6) | O(1)-Dy(1)-N(3) | 78.82(6)  |
| O(3)-Dy(1)-N(3) | 69.80(6)  | O(4)-Dy(1)-N(3) | 130.47(6) |
| O(2)-Dy(1)-N(1) | 88.35(7)  | O(1)-Dy(1)-N(1) | 94.21(7)  |
| O(3)-Dy(1)-N(1) | 91.56(7)  | O(4)-Dy(1)-N(1) | 76.89(7)  |
| N(3)-Dy(1)-N(1) | 131.82(7) | O(2)-Dy(1)-N(4) | 77.32(6)  |
| O(1)-Dy(1)-N(4) | 92.74(6)  | O(3)-Dy(1)-N(4) | 94.00(6)  |

|                  |           |                  |           |
|------------------|-----------|------------------|-----------|
| O(4)-Dy(1)-N(4)  | 87.46(7)  | N(3)-Dy(1)-N(4)  | 67.44(7)  |
| N(1)-Dy(1)-N(4)  | 160.54(7) | O(2)-Dy(1)-N(2)  | 135.01(6) |
| O(1)-Dy(1)-N(2)  | 76.97(6)  | O(3)-Dy(1)-N(2)  | 71.66(6)  |
| O(4)-Dy(1)-N(2)  | 124.80(6) | N(3)-Dy(1)-N(2)  | 66.26(7)  |
| N(1)-Dy(1)-N(2)  | 65.73(7)  | N(4)-Dy(1)-N(2)  | 133.67(7) |
| O(8)-Dy(2)-O(6)  | 73.97(6)  | O(8)-Dy(2)-O(9)  | 85.02(6)  |
| O(6)-Dy(2)-O(9)  | 142.15(6) | O(8)-Dy(2)-O(7)  | 71.46(6)  |
| O(6)-Dy(2)-O(7)  | 125.80(6) | O(9)-Dy(2)-O(7)  | 73.49(6)  |
| O(8)-Dy(2)-O(5)  | 101.56(6) | O(6)-Dy(2)-O(5)  | 70.31(6)  |
| O(9)-Dy(2)-O(5)  | 146.17(6) | O(7)-Dy(2)-O(5)  | 77.28(6)  |
| O(8)-Dy(2)-O(10) | 73.55(6)  | O(6)-Dy(2)-O(10) | 73.97(6)  |
| O(9)-Dy(2)-O(10) | 69.98(6)  | O(7)-Dy(2)-O(10) | 130.78(6) |
| O(5)-Dy(2)-O(10) | 143.80(6) | O(8)-Dy(2)-O(1)  | 149.62(6) |
| O(6)-Dy(2)-O(1)  | 133.75(6) | O(9)-Dy(2)-O(1)  | 76.80(6)  |
| O(7)-Dy(2)-O(1)  | 80.05(5)  | O(5)-Dy(2)-O(1)  | 81.78(6)  |
| O(10)-Dy(2)-O(1) | 120.83(6) | O(8)-Dy(2)-O(2)  | 144.26(6) |
| O(6)-Dy(2)-O(2)  | 79.17(6)  | O(9)-Dy(2)-O(2)  | 103.01(6) |
| O(7)-Dy(2)-O(2)  | 144.27(6) | O(5)-Dy(2)-O(2)  | 90.89(6)  |
| O(10)-Dy(2)-O(2) | 76.70(6)  | O(1)-Dy(2)-O(2)  | 64.82(5)  |

**Table S4** Continuous Shape Measures (CSHMs) of the coordination geometry for Dy (III) ion in compounds **1-3**. Below is the symmetry and description for each polyhedron.

| <b>Complex</b> |                 |                                   | CU-8     | SAPR-8   | TDD-8        |
|----------------|-----------------|-----------------------------------|----------|----------|--------------|
| <b>1</b>       |                 |                                   | 8.953    | 3.922    | <b>2.925</b> |
| <b>3</b>       | Dy1             |                                   | 12.018   | 3.564    | <b>1.131</b> |
|                | Dy2             |                                   | 9.145    | 1.526    | <b>0.705</b> |
| CU-8           | O <sub>h</sub>  | Cube                              |          |          |              |
| SAPR-8         | D <sub>4d</sub> | Square antiprism                  |          |          |              |
| TDD-8          | D <sub>2d</sub> | Triangular dodecahedron           |          |          |              |
| <b>Complex</b> |                 |                                   | JTCTPR-9 | JCSAPR-9 | CSAPR-9      |
| <b>2</b>       |                 |                                   | 3.314    | 3.529    | <b>2.836</b> |
| JTCTPR-9       | D <sub>3h</sub> | Tricapped trigonal prism J51      |          |          |              |
| JCSAPR-9       | C <sub>4v</sub> | Capped square antiprism J10       |          |          |              |
| CSAPR-9        | C <sub>4v</sub> | Spherical capped square antiprism |          |          |              |

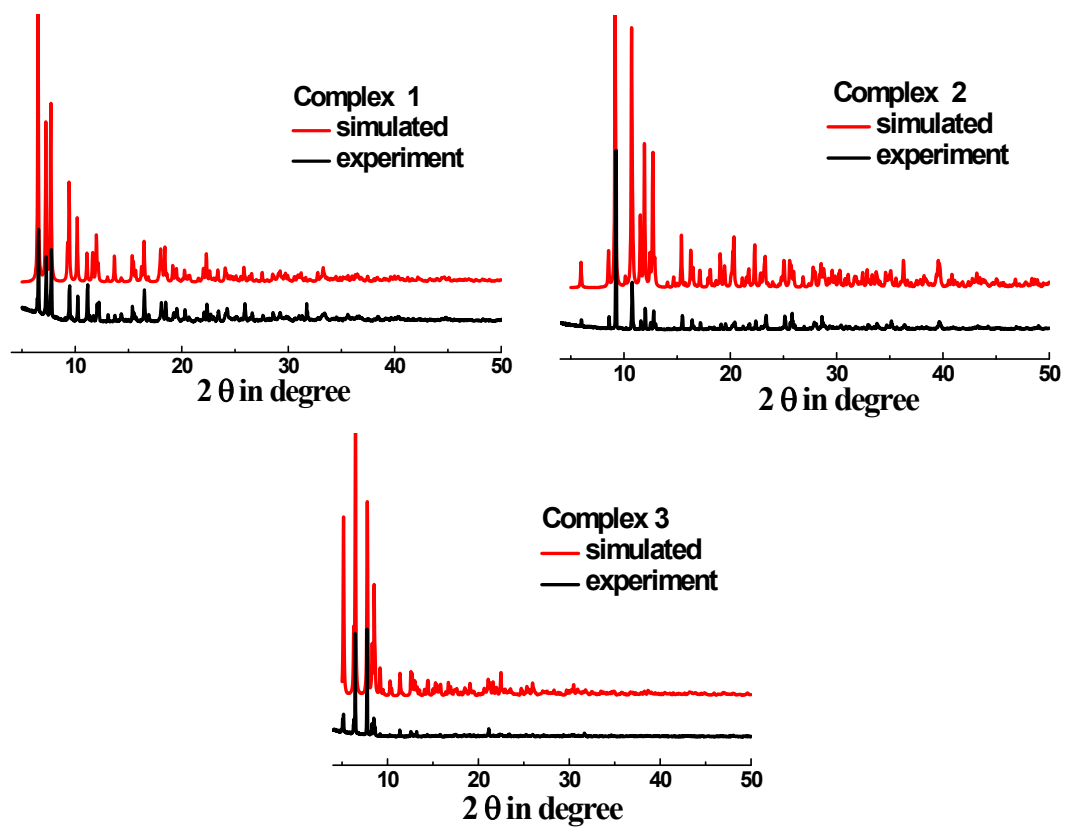

Fig. S1 PXRD patterns for complexes 3

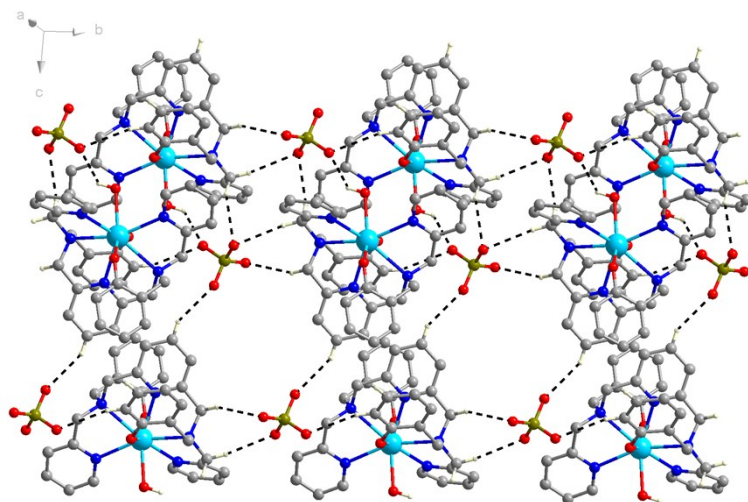

Fig. S2. A view showing 3D structure formed by weak C-H $\cdots$ O and O-H $\cdots$ O hydrogen bonds interactions in **1**.

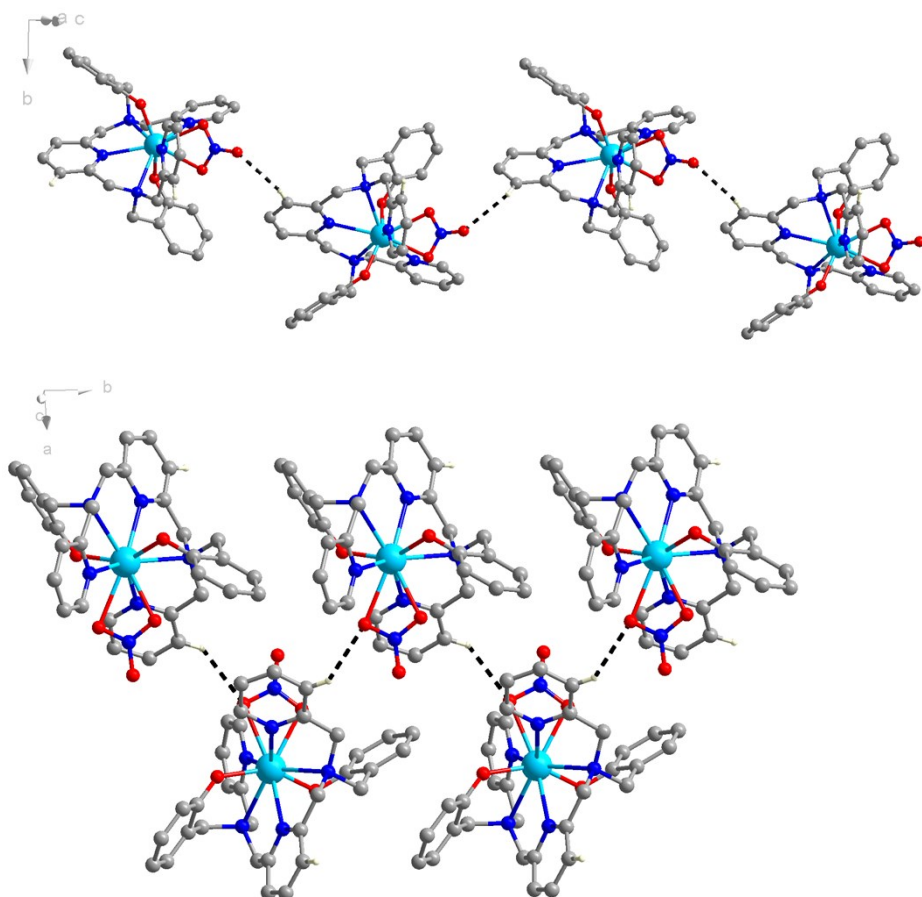

**Fig. S3.** A view showing 3D structure formed by weak C–H···O hydrogen bonds interactions in **2**.

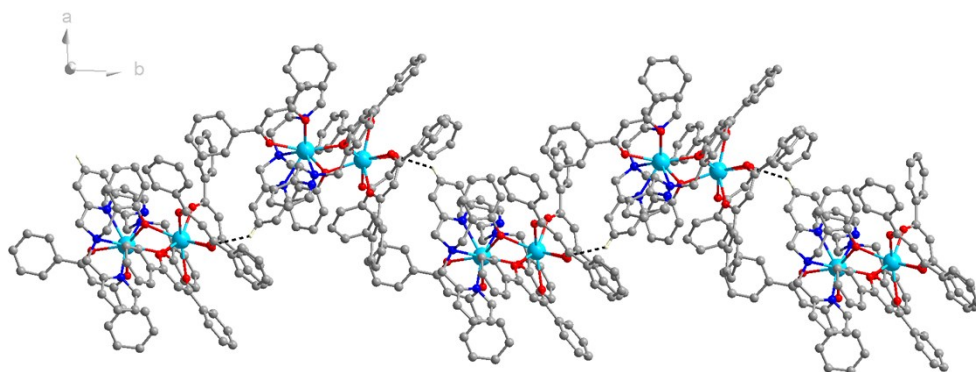

**Fig. S4.** A view showing 3D structure formed by weak C–H···O, C–H···C and  $\pi$ – $\pi$  stacking interactions in **3**.

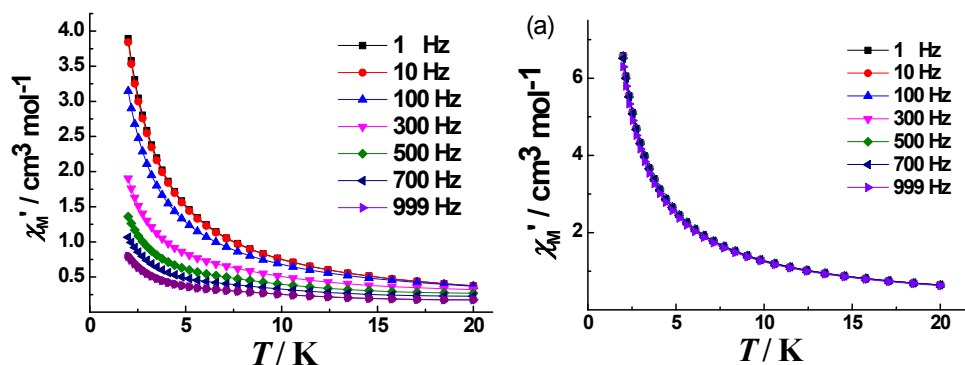

Fig.S5 Temperature dependence of the in-phase ( $\chi'$ ) of the ac susceptibility for **2** (left) and **3** (right) under a zero applied dc.

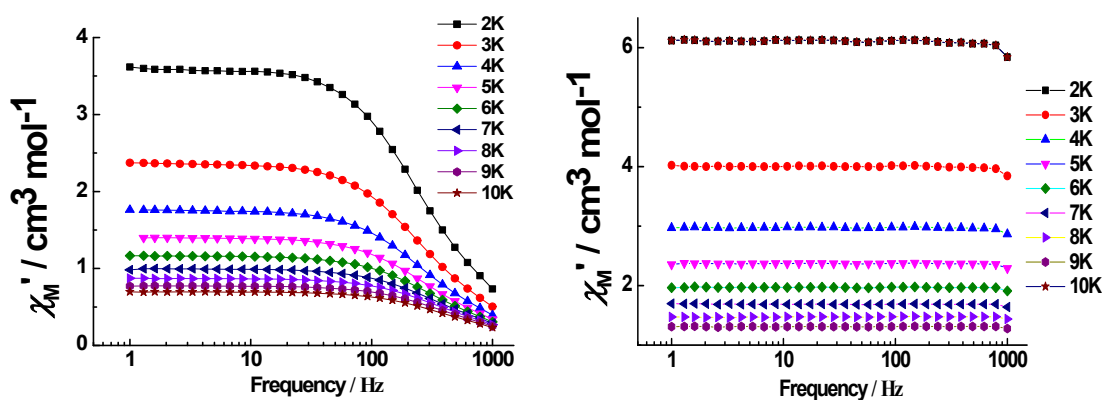

Fig.S6 Frequency dependence of the in-phase ( $\chi'$ ) ac susceptibility signals for **2** (left) and **3** (right) under a zero-dc field.

## Computational details

Mononuclear complexes **1** and **2** have one type of molecular structure, but binuclear complex **3** has two types of magnetic center Dy<sup>III</sup> ions indicated as **3\_Dy1** and **3\_Dy2**. Complete-active-space self-consistent field (CASSCF) calculations on complexes **1–3** (see Figure S7 for the calculated complete structures of complexes **1–3**) on the basis of single-crystal X-ray determined geometry have been carried out with MOLCAS 8.4<sup>S1</sup> program package. Each individual Dy<sup>III</sup> fragment in **3** was calculated keeping the experimentally determined structure of the corresponding compound while the neighboring Dy<sup>III</sup> ion was replaced by diamagnetic Lu<sup>III</sup>.

The basis sets for all atoms are atomic natural orbitals from the MOLCAS ANO-RCC library: ANO-RCC-VTZP for Dy<sup>III</sup>; VTZ for close N and O; VDZ for distant atoms. The calculations employed the second order Douglas-Kroll-Hess Hamiltonian, where scalar relativistic contractions were taken into account in the basis set and the spin-orbit couplings were handled separately in the

restricted active space state interaction (RASSI-SO) procedure. For individual Dy<sup>III</sup> fragment, active electrons in 7 active spaces include all *f* electrons (CAS(9 in 7)) in the CASSCF calculation. To exclude all the doubts, we calculated all the roots in the active space. We have mixed the maximum number of spin-free state which was possible with our hardware (all from 21 sextets, 128 from 224 quadruplets, 130 from 490 doublets). SINGLE\_ANISO<sup>S2</sup> program was used to obtain the energy levels, *g* tensors, *m<sub>J</sub>* values, magnetic axes, *et al.* based on the above CASSCF/RASSI-SO calculations.

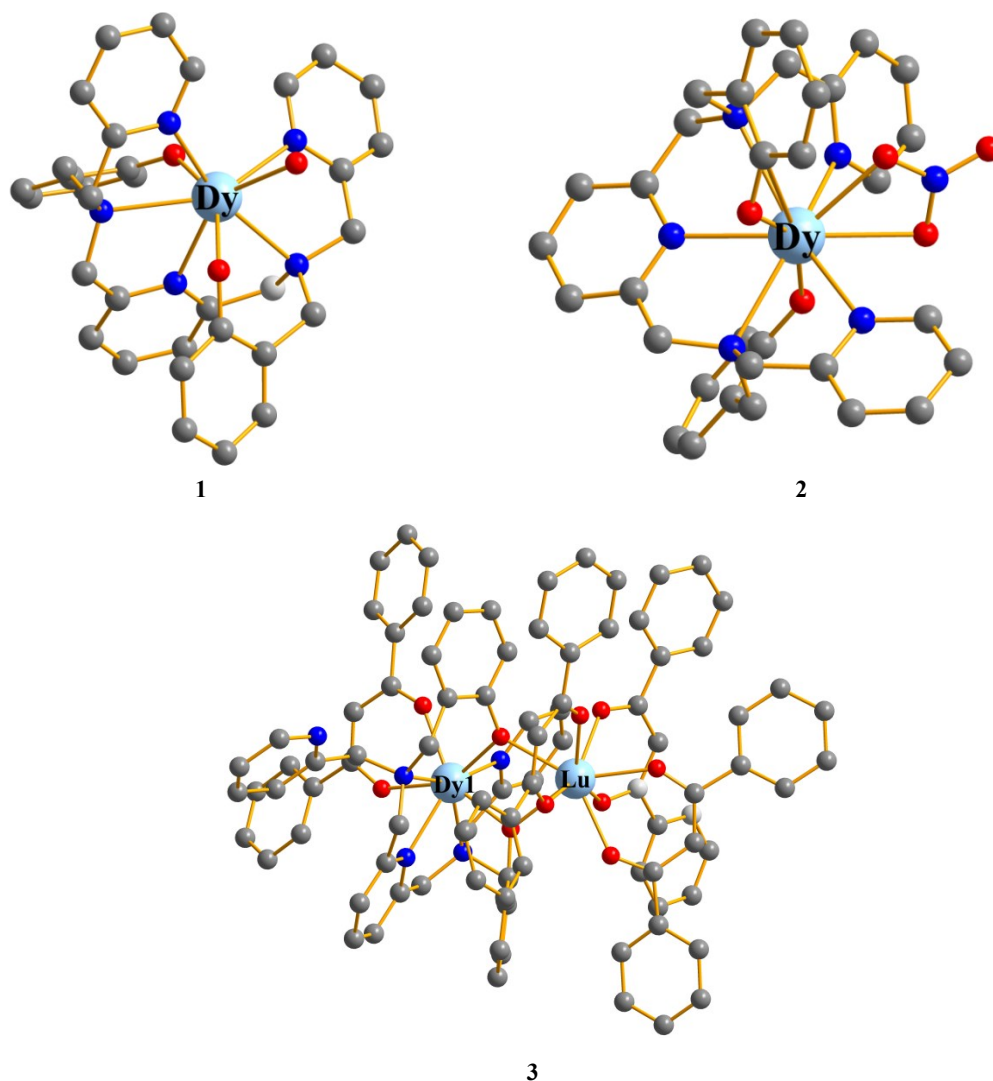

**Fig. S7.** Calculated complete structures of **1–3**; H atoms are omitted.

**Table S5.** Calculated energy levels (cm<sup>-1</sup>), *g* (*g<sub>x</sub>*, *g<sub>y</sub>*, *g<sub>z</sub>*) tensors and predominant *m<sub>J</sub>* values of the lowest eight Kramers doublets (KDs) of individual Dy<sup>III</sup> fragments for **1–3** using CASSCF/RASSI-SO with MOLCAS 8.4.

| KDs | <b>1</b>                   |                |                      | <b>2</b>                   |                |                      |
|-----|----------------------------|----------------|----------------------|----------------------------|----------------|----------------------|
|     | <i>E</i> /cm <sup>-1</sup> | <i>g</i>       | <i>m<sub>J</sub></i> | <i>E</i> /cm <sup>-1</sup> | <i>g</i>       | <i>m<sub>J</sub></i> |
| 1   | 0.0                        | 0.004<br>0.005 | ±15/2                | 0.0                        | 0.002<br>0.002 | ±15/2                |

|   |       |        |            |       |        |            |
|---|-------|--------|------------|-------|--------|------------|
|   |       | 19.811 |            |       | 19.851 |            |
|   |       | 0.100  |            |       | 0.044  |            |
| 2 | 284.4 | 0.120  | $\pm 13/2$ | 277.7 | 0.053  | $\pm 13/2$ |
|   |       | 16.950 |            |       | 16.985 |            |
|   |       | 0.512  |            |       | 0.101  |            |
| 3 | 498.1 | 0.635  | $\pm 11/2$ | 512.2 | 0.171  | $\pm 11/2$ |
|   |       | 13.628 |            |       | 13.922 |            |
|   |       | 5.189  |            |       | 4.221  |            |
| 4 | 617.5 | 5.379  | $\pm 9/2$  | 662.1 | 6.090  | $\pm 9/2$  |
|   |       | 7.910  |            |       | 8.985  |            |
|   |       | 1.291  |            |       | 1.329  |            |
| 5 | 666.7 | 3.396  | $\pm 1/2$  | 740.1 | 3.656  | $\pm 5/2$  |
|   |       | 13.589 |            |       | 12.828 |            |
|   |       | 0.085  |            |       | 1.744  |            |
| 6 | 697.5 | 0.841  | $\pm 3/2$  | 796.4 | 4.509  | $\pm 3/2$  |
|   |       | 15.334 |            |       | 9.312  |            |
|   |       | 0.274  |            |       | 1.063  |            |
| 7 | 785.0 | 1.881  | $\pm 7/2$  | 813.3 | 6.764  | $\pm 1/2$  |
|   |       | 17.226 |            |       | 13.023 |            |
|   |       | 0.023  |            |       | 0.105  |            |
| 8 | 809.1 | 2.161  | $\pm 5/2$  | 904.0 | 0.336  | $\pm 7/2$  |
|   |       | 17.423 |            |       | 18.895 |            |

| KDs | <b>3_Dy1</b>       |        |            | <b>3_Dy2</b>       |        |            |
|-----|--------------------|--------|------------|--------------------|--------|------------|
|     | $E/\text{cm}^{-1}$ | $g$    | $m_J$      | $E/\text{cm}^{-1}$ | $g$    | $m_J$      |
|     |                    | 0.110  |            |                    | 0.028  |            |
| 1   | 0.0                | 0.252  | $\pm 15/2$ | 0.0                | 0.098  | $\pm 15/2$ |
|     |                    | 19.198 |            |                    | 19.272 |            |
|     |                    | 1.169  |            |                    | 0.209  |            |
| 2   | 132.2              | 1.842  | $\pm 13/2$ | 60.2               | 0.268  | $\pm 1/2$  |
|     |                    | 15.660 |            |                    | 18.598 |            |
|     |                    | 4.174  |            |                    | 0.741  |            |
| 3   | 237.4              | 4.439  | $\pm 11/2$ | 104.2              | 1.191  | $\pm 11/2$ |
|     |                    | 10.113 |            |                    | 13.690 |            |
|     |                    | 2.270  |            |                    | 3.726  |            |
| 4   | 336.9              | 3.911  | $\pm 7/2$  | 149.6              | 5.705  | $\pm 5/2$  |
|     |                    | 9.747  |            |                    | 8.415  |            |
|     |                    | 0.057  |            |                    | 1.721  |            |
| 5   | 441.6              | 1.919  | $\pm 5/2$  | 175.9              | 4.776  | $\pm 7/2$  |
|     |                    | 12.266 |            |                    | 14.364 |            |
|     |                    | 0.810  |            |                    | 0.324  |            |
| 6   | 498.4              | 1.203  | $\pm 3/2$  | 192.9              | 1.208  | $\pm 9/2$  |
|     |                    | 15.396 |            |                    | 18.247 |            |
| 7   | 536.1              | 0.207  | $\pm 1/2$  | 215.3              | 0.034  | $\pm 3/2$  |



|   |       |        |           |       |        |            |
|---|-------|--------|-----------|-------|--------|------------|
|   |       | 0.309  |           |       | 0.307  |            |
|   |       | 17.342 |           |       | 19.355 |            |
|   |       | 0.033  |           |       | 0.000  |            |
| 8 | 653.5 | 0.054  | $\pm 9/2$ | 382.2 | 0.003  | $\pm 13/2$ |
|   |       | 19.466 |           |       | 19.731 |            |

**Table S6.** Wave functions with definite projection of the total moment  $|m_J\rangle$  for the lowest two KDs of individual Dy<sup>III</sup> fragments for **1–3**, respectively, using CASSCF/RASSI-SO with MOLCAS 8.4.

|              | $E/\text{cm}^{-1}$ | wave functions                                                                                        |
|--------------|--------------------|-------------------------------------------------------------------------------------------------------|
| <b>1</b>     | 0.0                | 98.82% $ \pm 15/2\rangle$                                                                             |
|              | 284.4              | 94.90% $ \pm 13/2\rangle$                                                                             |
| <b>2</b>     | 0.0                | 99.81% $ \pm 15/2\rangle$                                                                             |
|              | 277.7              | 98.82% $ \pm 13/2\rangle$                                                                             |
| <b>3_Dy1</b> | 0.0                | 88.87% $ \pm 15/2\rangle$ +9.71% $ \pm 11/2\rangle$                                                   |
|              | 132.2              | 45.93% $ \pm 13/2\rangle$ +28.18% $ \pm 9/2\rangle$ +8.23% $ \pm 7/2\rangle$ +6.05% $ \pm 5/2\rangle$ |
| <b>3_Dy2</b> | 0.0                | 89.54% $ \pm 15/2\rangle$ +9.09% $ \pm 11/2\rangle$                                                   |
|              | 60.2               | 41.46% $ \pm 1/2\rangle$ +29.54% $ \pm 3/2\rangle$ +14.53% $ \pm 5/2\rangle$                          |

To fit the exchange interaction in **3**, we took two steps to obtain them. Firstly, we calculated individual Dy<sup>III</sup> fragments using CASSCF/RASSI-SO to obtain the corresponding magnetic properties. Then, the exchange interaction between the magnetic centers is considered within the Lines model,<sup>S3</sup> while the account of the dipole-dipole magnetic coupling is treated exactly. The Lines model is effective and has been successfully used widely in the research field of  $d$  and  $f$ -elements single-molecule magnets.<sup>S4</sup>

The Ising exchange Hamiltonians for **3** is:

$$\hat{H}_{\text{exch}} = -J\hat{S}_{\text{Dy1}}\hat{S}_{\text{Dy2}} \quad (1)$$

The  $J = 25\cos\varphi J_{\text{exch}}$ , where  $\varphi$  is the angle between the anisotropy axes on sites Dy1 and Dy2, and  $J_{\text{exch}}$  is the Lines exchange coupling parameter. The  $S_{\text{Dy}} = 1/2$  is the ground pseudospin on the Dy<sup>III</sup> sites. The dipolar magnetic coupling can be calculated exactly, while the exchange coupling constant was fitted through comparison of the computed and measured magnetic susceptibility using the POLY\_ANISO program.<sup>S2</sup>

**Table S7.** Exchange energies  $E$  ( $\text{cm}^{-1}$ ), the energy difference between each exchange doublets  $\Delta_t$  ( $\text{cm}^{-1}$ ) and the main values of the  $g_z$  for the lowest two exchange doublets of **3**.

|   | $E$ | $\Delta_t$           | $g_z$  |
|---|-----|----------------------|--------|
| 1 | 0.0 | $1.2 \times 10^{-3}$ | 22.704 |
| 2 | 2.0 | $1.0 \times 10^{-3}$ | 30.909 |

## References:

- S1 F. Aquilante, J. Autschbach, R. K. Carlson, L. F. Chibotaru, M. G. Delcey, L. De Vico, I. Fdez. Galván, N. Ferré, L. M. Frutos, L. Gagliardi, M. Garavelli, A. Giussani, C. E. Hoyer, G. Li Manni, H. Lischka, D. Ma, P. Å. Malmqvist, T. Müller, A. Nenov, M. Olivucci, T. B. Pedersen, D. Peng, F. Plasser, B. Pritchard, M. Reiher, I. Rivalta, I. Schapiro, J. Segarra - Martí, M. Stenrup, D. G. Truhlar, L. Ungur, A. Valentini, S. Vancoillie, V. Veryazov, V. P. Vysotskiy, O. Weingart, F. Zapata, R. Lindh, MOLCAS 8: New Capabilities for Multiconfigurational Quantum Chemical Calculations across the Periodic Table, *J. Comput. Chem.*, **2016**, *37*, 506–541.
- S2 (a) Chibotaru, L. F.; Ungur, L.; Soncini, A. *Angew. Chem. Int. Ed.*, **2008**, *47*, 4126–4129. (b) Ungur, L.; Van den Heuvel, W.; Chibotaru, L. F. *New J. Chem.*, **2009**, *33*, 1224–1230. (c) Chibotaru, L. F.; Ungur, L.; Aronica, C.; Elmoll, H.; Pilet, G.; Luneau, D. *J. Am. Chem. Soc.*, **2008**, *130*, 12445–12455.
- S3 Lines, M. E. *J. Chem. Phys.* **1971**, *55*, 2977–2984.
- S4 (a) Mondal, K. C.; Sundt, A.; Lan, Y. H.; Kostakis, G. E.; Waldmann, O.; Ungur, L.; Chibotaru, L. F.; Anson, C. E.; Powell, A. K. *Angew. Chem. Int. Ed.* **2012**, *51*, 7550–7554. (b) Langley, S. K.; Wielechowski, D. P.; Vieru, V.; Chilton, N. F.; Moubaraki, B.; Abrahams, B. F.; Chibotaru, L. F.; Murray, K. S. *Angew. Chem. Int. Ed.* **2013**, *52*, 12014–12019.
